# Supplementary material for: Organization of cubic CeO2 nanoparticles on the edges of self assembled tapered ZnO nanorods via a template free one-pot synthesis: significant cathodoluminescence and field emission properties
Source: Royal Society of Chemistry journal article supplement (doi:10.1039/c2jm30226h), 2012-01-01
Supplement: c2jm30226h.pdf [file c2jm30226h.pdf]

**Electronic Supporting Information:**

**ESI-Table 1: Controlled experimental conditions**

| Sr. No. | Reaction Conditions                                          | Cerium nitrate      | H <sub>2</sub> O | Ethanol | EG | Substrate                                                | Morphology                                                               |
|---------|--------------------------------------------------------------|---------------------|------------------|---------|----|----------------------------------------------------------|--------------------------------------------------------------------------|
| 1       | 5mmol concentration, Hydrothermal Temperature 95 °C for 12 h | -                   | 1                | -       | 4  | -                                                        | Urchin-like nanoneedles (SI- Figure 1a)                                  |
| 2       |                                                              | 1                   | 2                | 2       | -  | -                                                        | Nanorod/particle mixed (SI-Figure 1b)                                    |
| 3       |                                                              | 1                   | 4                | -       | -  | -                                                        | Nanoparticle (SI-Figure 1c)                                              |
| 4       |                                                              | 1                   | -                | -       | -  | -                                                        | Nanorod/sphere (SI-Figure 1d)                                            |
| 5       |                                                              | -                   | 1                | -       | -  | Zn                                                       | Nanorods (Figure 6a)                                                     |
| 6       |                                                              | 1                   | -                | -       | Zn | Nanotubes with CeO <sub>2</sub> nanoparticles(Figure 6b) |                                                                          |
| 7       |                                                              | 1                   | -                | 4       | Zn | Nanorod attached CeO <sub>2</sub> particles (Figure 6c)  |                                                                          |
| 8       |                                                              | Ultrasonication 1 h | 1                | -       | -  | -                                                        | Nanotubes (~ 50 nm) with randomly CeO <sub>2</sub> particles (Figure 6d) |

### ESI-Fig. 1

#### Monte Carlo data

Assumptions used for all:

- 5nm probe diameter (focussing of the electron beam in a W-SEM)
- Accelerating voltage: 15kV
- # Electron trajectories simulated:  $5 \times 10^5$

#### 500nm ZnO nanowire

ZnO assumptions:

- 500nm wide sample (but with infinite depth)
- Minority carrier diffusion length 150nm
- Surface recombination 0.25 (where 0 = perfect sink and 1 = reflector)

#### CL Emission as a function of distance from the electron beam in the xy plane (surface)

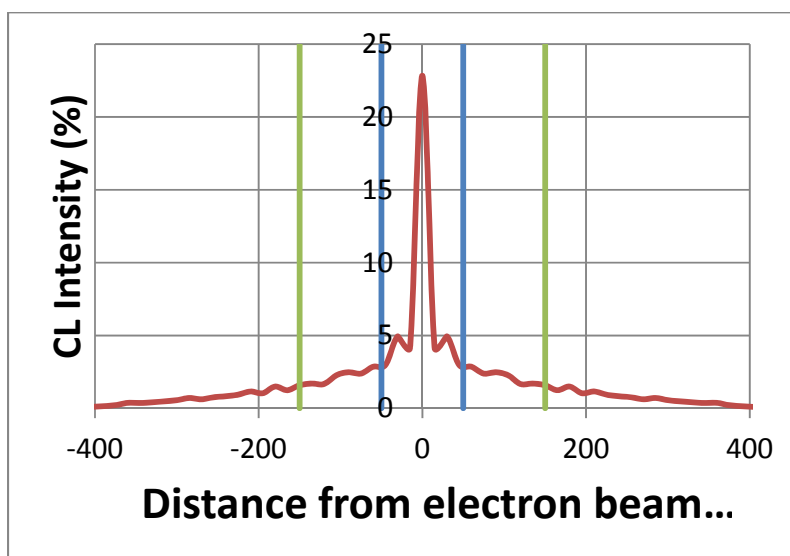

Blue vertical lines show distance at which >50% limit of the CL intensity, green line shows >75% limit

### CL Emission as a function of depth within the nanowire

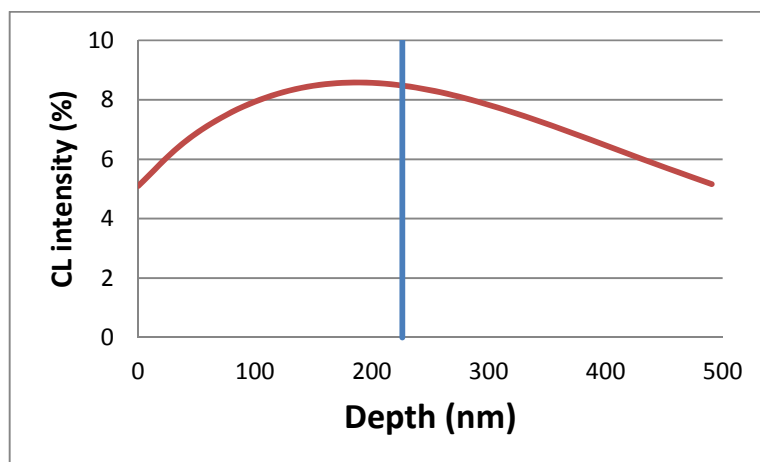

Blue vertical lines show distance at which >50% limit of the CL intensity

## Bulk CeO<sub>2</sub>

### CL intensity as a function of depth

Penetration of the electron beam is large, 50% of CL emission comes from within the top 450nm:

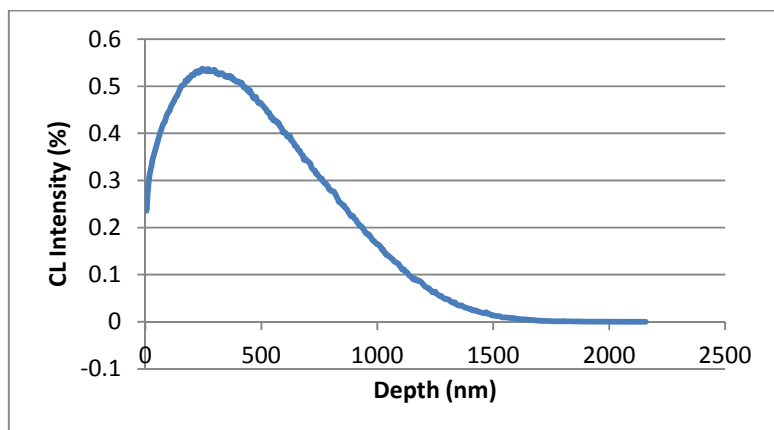

### CL intensity as a function of radius

Spread of the electron beam is large but >50% of CL emission is within 50nm of the position of the electron beam.

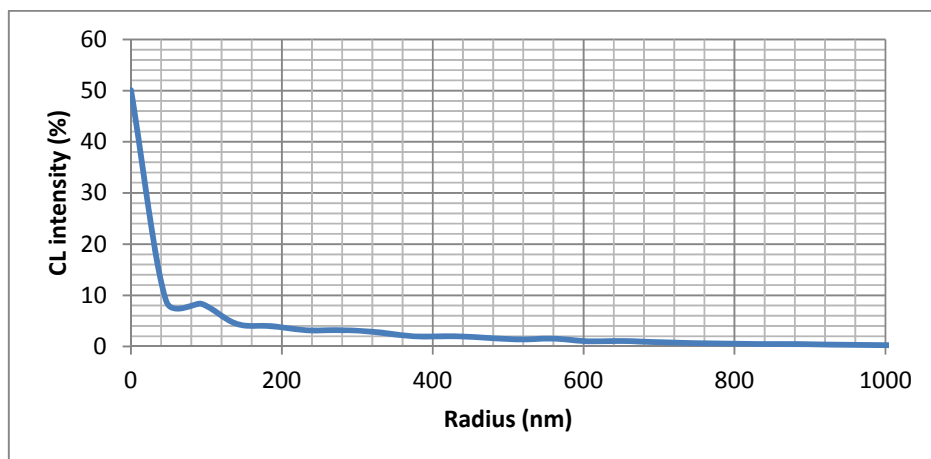

## 15nm CeO<sub>2</sub> particle

- 15nm deep sample
- Minority carrier diffusion length 5nm
- Surface recombination 0.25 (where 0 = perfect sink and 1 = reflector)

Transmitted energy calculated to be: 99.1%

Energy distribution of transmitted electrons:

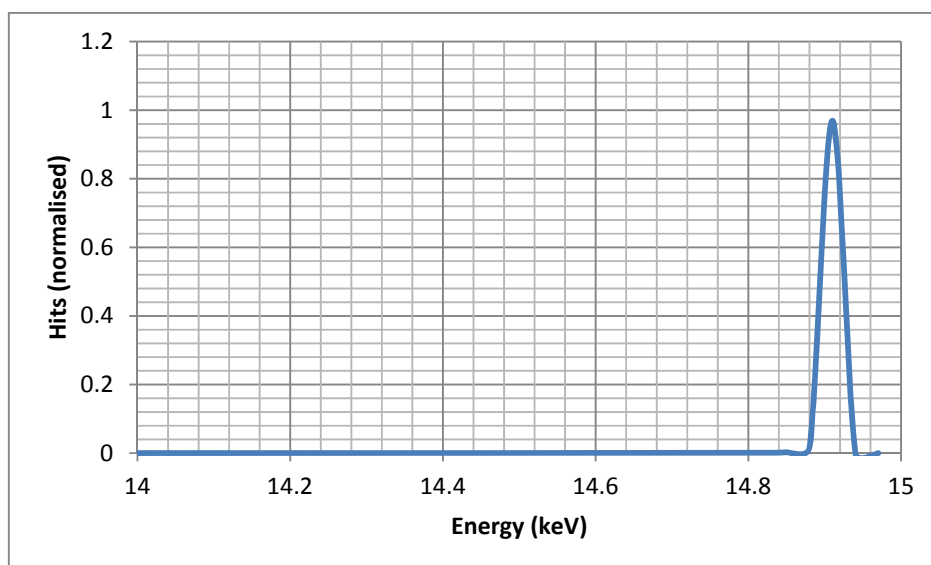

CL Emission as a function of depth within the CeO<sub>2</sub> nanoparticle:

Reasonably uniform emission from within the particle

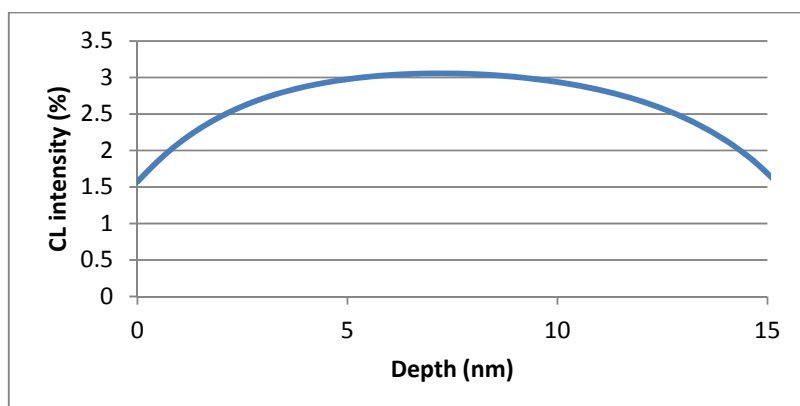

ESI-Fig. 2

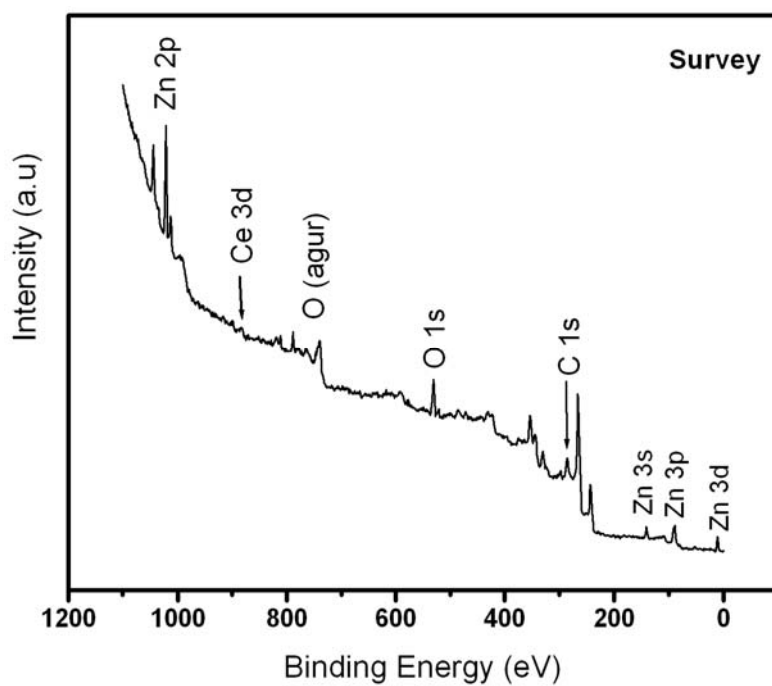

Fig. 2 XPS survey of as-synthesized CeO<sub>2</sub>-ZnO nanocomposites

ESI-Fig. 3

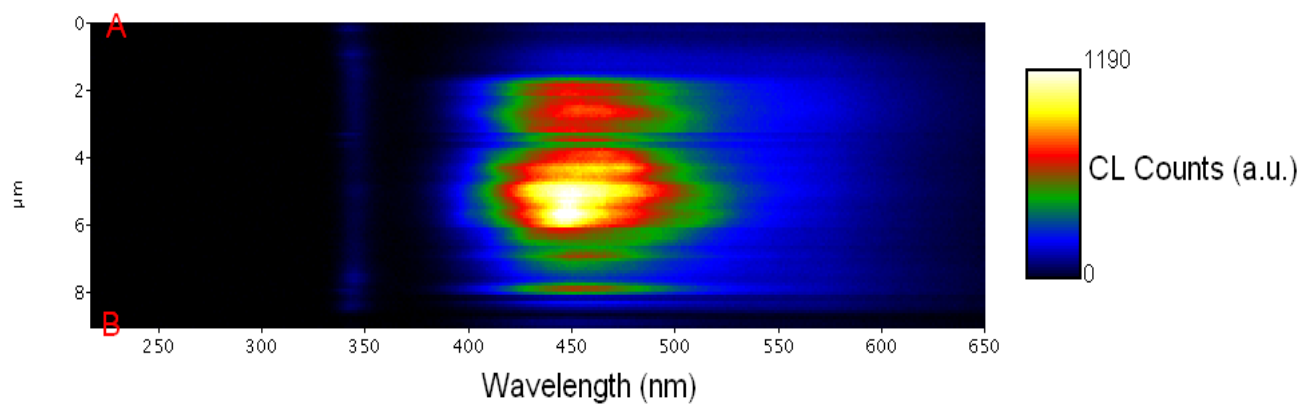

**Fig. 3** 2D view of 100 spectra over a 9  $\mu\text{m}$  length i.e. a spectrum recorded every 90 nm which corresponds approximately to the spatial resolution.

ESI-Fig. 4

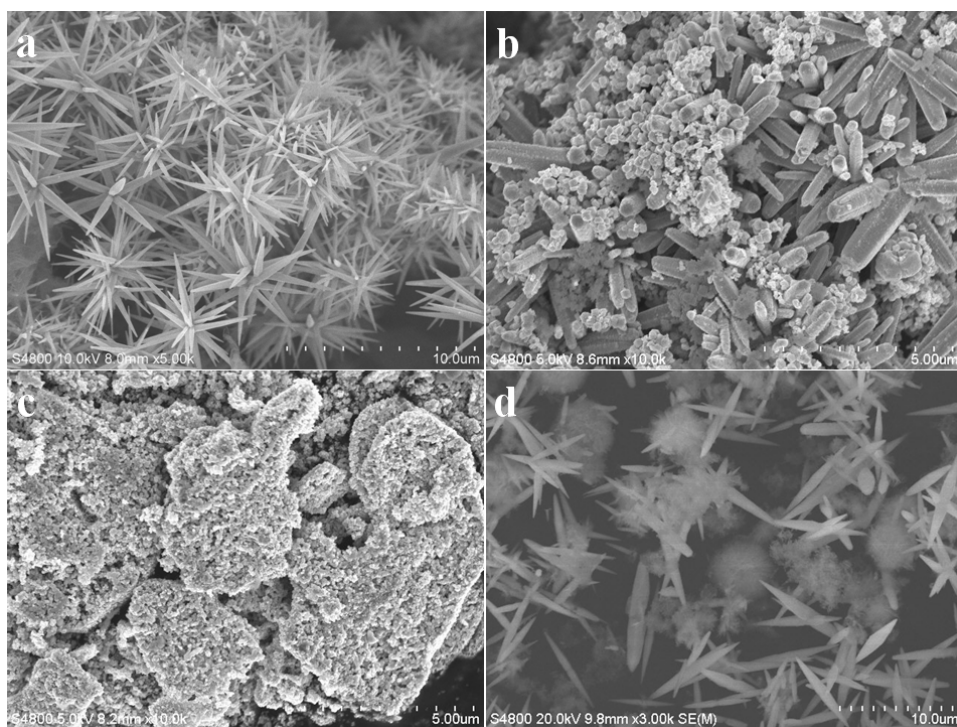

**Fig. 4** FESEM micrographs of (a) ZnO nanostructured in mixture of EG: H<sub>2</sub>O (3:1), (b) CeO<sub>2</sub>-ZnO nanocomposite in mixture of H<sub>2</sub>O: ethanol: EG (1:2:2), (c) CeO<sub>2</sub>-ZnO nanocomposite in mixture of H<sub>2</sub>O: ethanol (1:3) and (d) CeO<sub>2</sub>-ZnO nanocomposite in H<sub>2</sub>O.
